# Supplementary material for: One-pot, large-scale, simple synthesis of CoxP nanocatalysts for electrochemical hydrogen evolution
Source: Royal Society of Chemistry journal article supplement (doi:10.1039/c6ta05503f), 2016-01-01
Supplement: c6ta05503f1.pdf [file c6ta05503f1.pdf]

## Supporting information

### **One-pot, large-scale, facile synthesis of CoxP nanocatalysts for electrochemical hydrogen evolution**

Lihong Tian,<sup>a,b</sup> Xiaodong Yan,<sup>a</sup> Xuejiao Chen,<sup>c</sup> Lei Liu,<sup>c,\*</sup> Xiaobo Chen<sup>a,\*</sup>

<sup>a</sup> Department of Chemistry, University of Missouri – Kansas City, Kansas City, Missouri, 64110, USA. E-mail: chenxiaobo@umkc.edu

<sup>b</sup> Hubei Collaborative Innovation Center for Advanced Organochemical Materials, Ministry of Education Key Laboratory for the Synthesis and Applications of Organic Functional Molecules, Hubei University, Wuhan 430062, PR China

<sup>c</sup> State Key Laboratory of Luminescence and Applications, Changchun Institute of Optics, Fine Mechanics and Physics, Chinese Academy of Sciences, Changchun, 130033, China.  
Email: liulei@ciomp.ac.cn

## **2. Experimental section**

### **2.1 Catalyst preparation**

In a typical process, 1.19 g of Co (OH)<sub>2</sub> and 1.33 g of Na<sub>2</sub>HPO<sub>2</sub>·H<sub>2</sub>O was grinded in a agate mortar, then the obtained mixture was calcinated in argon atmosphere at 250–400 °C for 3h. The collected product was dispersed ultrasonically into a 2.0 M HCl solution and kept on stirring for 12 h. A black powder was obtained after washed by deionized water for several times and dried in an oven at 100 °C overnight. Hydrogenation was performed on all as-prepared samples at 350 °C for 6h under pure hydrogen environments.

### **2.2 Characterizations**

The crystal structure of products was characterized by a Rigaku Miniflex X-ray Diffractometer (XRD) with a CuK $\alpha$  ( $\lambda$ = 0.15418 nm) radiation source. The morphologies and structure of the samples were observed by transmission electron microscopy (TEM, FEI Tecnai F20 STEM) with the electron accelerating voltage of 200 kV. A small amount of powder sample dispersed in ethanol was dropped onto a thin holey carbon film, and dried overnight before TEM measurement. XPS data were collected using a Kratos Axis 165 X-ray photoelectron spectrometer with an Al/Mg dual-anode X-ray source, using a photon beam of 1486.6 eV.

All electrochemical measurements were carried out in a three-electrode system at room temperature. A Pt wire, an Ag/AgCl electrode, and 0.5 M H<sub>2</sub>SO<sub>4</sub> were used as the counter electrode, reference electrode, and electrolyte, respectively. The working electrode was prepared by coating a mixture slurry of catalyst powder, carbon black and polyvinylidene fluoride (weight ratio = 8:1:1) in 0.05 mL N-methyl-2-pyrrolidone solution on

a titanium foil. The mass loading is about  $0.7 \text{ mg cm}^{-2}$  (catalyst loading  $\approx 0.56 \text{ mg cm}^{-2}$ ). Linear sweep voltammetry (LSV) at a scan rate of  $5 \text{ mV s}^{-1}$  and electrochemical impedance spectroscopy (EIS) analysis using a  $10 \text{ mV}$  amplitude AC signal over a frequency range from  $100 \text{ kHz}$  to  $10 \text{ mHz}$  were performed on a electrochemical workstation. The commercial Pt/C was used as the state-of-the-art HER catalyst for comparison. All polarization curves were iR-corrected for an ohmic drop obtained from Nyquist plot. Reversible hydrogen electrode (RHE) calibration was carried out using Ag/AgCl as the reference electrode. The calibration was performed in the high purity hydrogen saturated  $0.5 \text{ M H}_2\text{SO}_4$  electrolyte with a Pt wire as the working electrode. The long-term stability test was measured at a constant voltage over the duration of  $15,000 \text{ s}$ . The Faradaic efficiency was calculated by comparing the charge with the amount of hydrogen and oxygen produced with a gas chromatography equipped with a thermal conductivity detector (TCD).

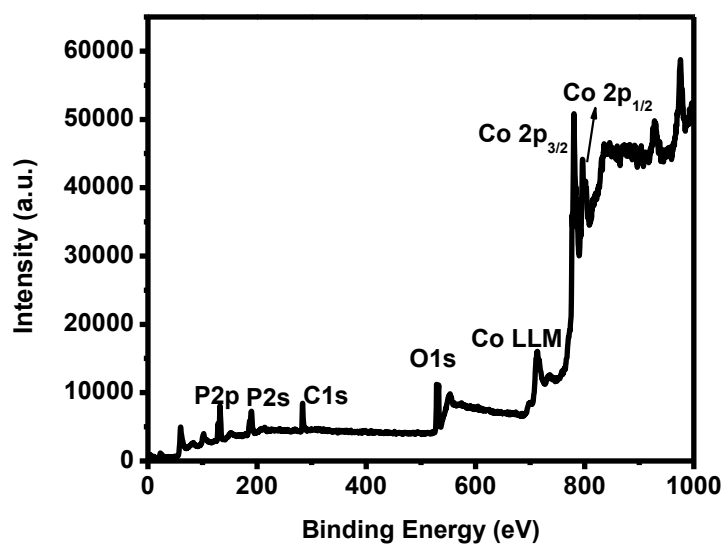

**Fig. S1.** The XPS survey of Co<sub>x</sub>P nanoparticles.

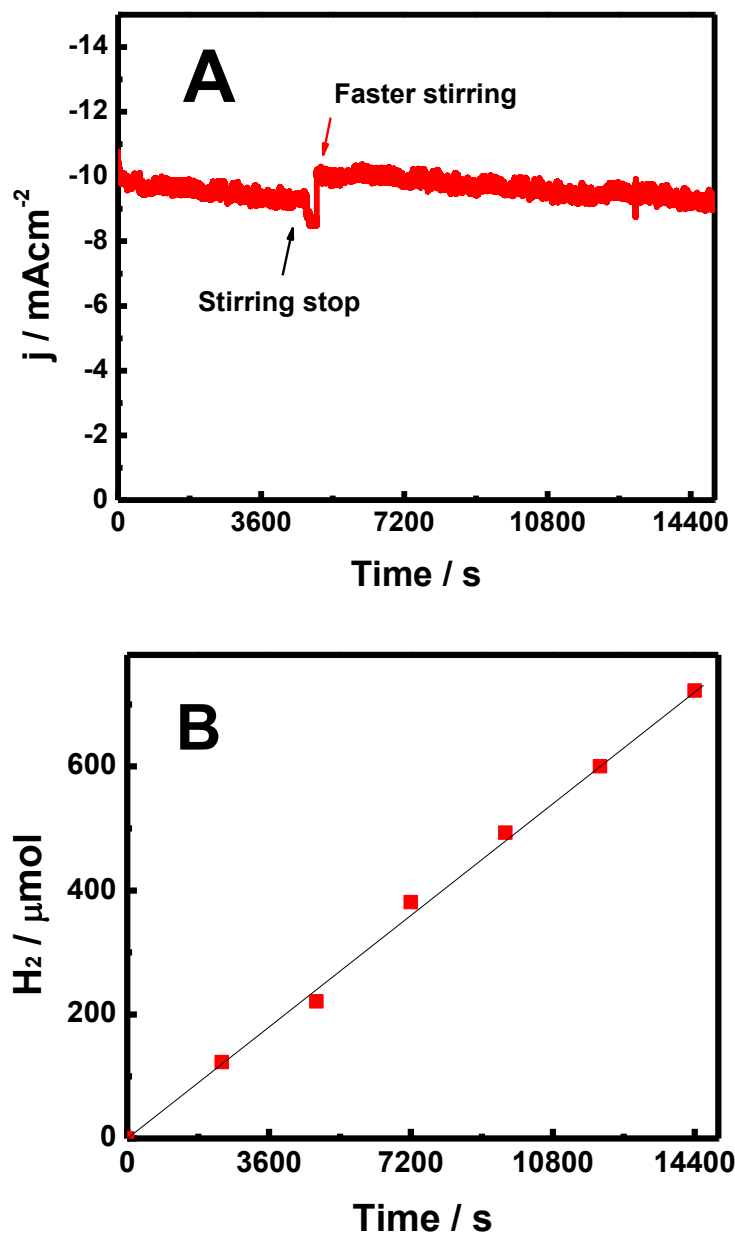

**Figure S2.** (A) Current–time characteristics of  $\text{Co}_x\text{P}$  for the stability test at an overpotential of 150 mV, and (B) the corresponding  $\text{H}_2$  produced.
